# Supplementary material
Source: publisher site journal article supplement (https://www.dovepress.com/article/375107)
Supplement: Supplementary file 1 [file get_supplementary_file.php]

**Supplementary Material**

**Supplementary Data S1. Search strategy2**

**Supplementary Figure S2. Risk of bias across studies5**

**Supplementary Figure S3. Plot of Secondary outcomes6**

**Supplementary Figure S4. Sensitivity analysis results 8**

**Supplementary Data S1. Search strategy**

PubMed

Query

((((((((((((Pulmonary Disease, Chronic Obstructive) OR (Chronic Obstructive Lung Disease)) OR (Chronic Obstructive Pulmonary Diseases)) OR (COAD)) OR (COPD)) OR (Chronic Obstructive Airway Disease)) OR (Chronic Obstructive Pulmonary Disease)) OR (Airflow Obstruction, Chronic)) OR (Airflow Obstructions, Chronic)) OR (Chronic Airflow Obstructions)) OR (Chronic Airflow Obstruction)) AND (((((((High-Flow Nasal Cannula) OR (HFNC)) OR (High-Flow Oxygen Therapy)) OR (High-Flow nasal oxygen)) OR (High nasal flow)) OR (High-Flow nasal cannula oxygen therapy)) OR (High-Flow oxygen))) AND ((((((((((((Noninvasive ventilation) OR (Noninvasive Ventilations)) OR (Ventilation, Noninvasive)) OR (Ventilations, Noninvasive)) OR (Non-Invasive Ventilation)) OR (Non-Invasive Ventilations)) OR (Ventilation, Non-Invasive)) OR (Ventilations, Non-Invasive)) OR (Non Invasive Ventilation)) OR (Non Invasive Ventilations)) OR (Ventilation, Non Invasive)) OR (Ventilations, Non Invasive))

**Search Details**

**("pulmonary disease, chronic obstructive"[MeSH Terms] OR ("pulmonary"[All Fields] AND "disease"[All Fields] AND "chronic"[All Fields] AND "obstructive"[All Fields]) OR "chronic obstructive pulmonary disease"[All Fields] OR ("pulmonary"[All Fields] AND "disease"[All Fields] AND "chronic"[All Fields] AND "obstructive"[All Fields]) OR "pulmonary disease chronic obstructive"[All Fields] OR ("pulmonary disease, chronic obstructive"[MeSH Terms] OR ("pulmonary"[All Fields] AND "disease"[All Fields] AND "chronic"[All Fields] AND "obstructive"[All Fields]) OR "chronic obstructive pulmonary disease"[All Fields] OR ("chronic"[All Fields] AND "obstructive"[All Fields] AND "lung"[All Fields] AND "disease"[All Fields]) OR "chronic obstructive lung disease"[All Fields]) OR ("pulmonary disease, chronic obstructive"[MeSH Terms] OR ("pulmonary"[All Fields] AND "disease"[All Fields] AND "chronic"[All Fields] AND "obstructive"[All Fields]) OR "chronic obstructive pulmonary disease"[All Fields] OR ("chronic"[All Fields] AND "obstructive"[All Fields] AND "pulmonary"[All Fields] AND "diseases"[All Fields]) OR "chronic obstructive pulmonary diseases"[All Fields]) OR ("pulmonary disease, chronic obstructive"[MeSH Terms] OR ("pulmonary"[All Fields] AND "disease"[All Fields] AND "chronic"[All Fields] AND "obstructive"[All Fields]) OR "chronic obstructive pulmonary disease"[All Fields] OR "coad"[All Fields]) OR ("pulmonary disease, chronic obstructive"[MeSH Terms] OR ("pulmonary"[All Fields] AND "disease"[All Fields] AND "chronic"[All Fields] AND "obstructive"[All Fields]) OR "chronic obstructive pulmonary disease"[All Fields] OR "copd"[All Fields]) OR ("pulmonary disease, chronic obstructive"[MeSH Terms] OR ("pulmonary"[All Fields] AND "disease"[All Fields] AND "chronic"[All Fields] AND "obstructive"[All Fields]) OR "chronic obstructive pulmonary disease"[All Fields] OR ("chronic"[All Fields] AND "obstructive"[All Fields] AND "airway"[All Fields] AND "disease"[All Fields]) OR "chronic obstructive airway disease"[All Fields]) OR ("pulmonary disease, chronic obstructive"[MeSH Terms] OR ("pulmonary"[All Fields] AND "disease"[All Fields] AND "chronic"[All Fields] AND "obstructive"[All Fields]) OR "chronic obstructive pulmonary disease"[All Fields] OR ("chronic"[All Fields] AND "obstructive"[All Fields] AND "pulmonary"[All Fields] AND "disease"[All Fields])) OR ("pulmonary disease, chronic obstructive"[MeSH Terms] OR ("pulmonary"[All Fields] AND "disease"[All Fields] AND "chronic"[All Fields] AND "obstructive"[All Fields]) OR "chronic obstructive pulmonary disease"[All Fields] OR ("airflow"[All Fields] AND "obstruction"[All Fields] AND "chronic"[All Fields]) OR "airflow obstruction chronic"[All Fields]) OR ("pulmonary disease, chronic obstructive"[MeSH Terms] OR ("pulmonary"[All Fields] AND "disease"[All Fields] AND "chronic"[All Fields] AND "obstructive"[All Fields]) OR "chronic obstructive pulmonary disease"[All Fields] OR ("airflow"[All Fields] AND "obstructions"[All Fields] AND "chronic"[All Fields]) OR "airflow obstructions chronic"[All Fields]) OR ("pulmonary disease, chronic obstructive"[MeSH Terms] OR ("pulmonary"[All Fields] AND "disease"[All Fields] AND "chronic"[All Fields] AND "obstructive"[All Fields]) OR "chronic obstructive pulmonary disease"[All Fields] OR ("chronic"[All Fields] AND "airflow"[All Fields] AND "obstructions"[All Fields]) OR "chronic airflow obstructions"[All Fields]) OR ("pulmonary disease, chronic obstructive"[MeSH Terms] OR ("pulmonary"[All Fields] AND "disease"[All Fields] AND "chronic"[All Fields] AND "obstructive"[All Fields]) OR "chronic obstructive pulmonary disease"[All Fields] OR ("chronic"[All Fields] AND "airflow"[All Fields] AND "obstruction"[All Fields]) OR "chronic airflow obstruction"[All Fields])) AND (("High-Flow"[All Fields] AND ("cannula"[MeSH Terms] OR "cannula"[All Fields] OR ("nasal"[All Fields] AND "cannula"[All Fields]) OR "nasal cannula"[All Fields])) OR "HFNC"[All Fields] OR ("High-Flow"[All Fields] AND ("oxygen inhalation therapy"[MeSH Terms] OR ("oxygen"[All Fields] AND "inhalation"[All Fields] AND "therapy"[All Fields]) OR "oxygen inhalation therapy"[All Fields] OR ("oxygen"[All Fields] AND "therapy"[All Fields]) OR "oxygen therapy"[All Fields])) OR ("High-Flow"[All Fields] AND ("nasalance"[All Fields] OR "nasality"[All Fields] OR "nasalization"[All Fields] OR "nasalized"[All Fields] OR "nasally"[All Fields] OR "nose"[MeSH Terms] OR "nose"[All Fields] OR "nasal"[All Fields] OR "nasals"[All Fields]) AND ("cell respiration"[MeSH Terms] OR ("cell"[All Fields] AND "respiration"[All Fields]) OR "cell respiration"[All Fields] OR "oxygenation"[All Fields] OR "oxygen"[MeSH Terms] OR "oxygen"[All Fields] OR "oxygen s"[All Fields] OR "oxygenate"[All Fields] OR "oxygenated"[All Fields] OR "oxygenates"[All Fields] OR "oxygenating"[All Fields] OR "oxygenations"[All Fields] OR "oxygenative"[All Fields] OR "oxygenator s"[All Fields] OR "oxygenators"[MeSH Terms] OR "oxygenators"[All Fields] OR "oxygenator"[All Fields] OR "oxygene"[All Fields] OR "oxygenic"[All Fields] OR "oxygenous"[All Fields] OR "oxygens"[All Fields])) OR ("High"[All Fields] AND ("nasalance"[All Fields] OR "nasality"[All Fields] OR "nasalization"[All Fields] OR "nasalized"[All Fields] OR "nasally"[All Fields] OR "nose"[MeSH Terms] OR "nose"[All Fields] OR "nasal"[All Fields] OR "nasals"[All Fields]) AND "flow"[All Fields]) OR ("High-Flow"[All Fields] AND ("cannula"[MeSH Terms] OR "cannula"[All Fields] OR ("nasal"[All Fields] AND "cannula"[All Fields]) OR "nasal cannula"[All Fields]) AND ("oxygen inhalation therapy"[MeSH Terms] OR ("oxygen"[All Fields] AND "inhalation"[All Fields] AND "therapy"[All Fields]) OR "oxygen inhalation therapy"[All Fields] OR ("oxygen"[All Fields] AND "therapy"[All Fields]) OR "oxygen therapy"[All Fields])) OR ("High-Flow"[All Fields] AND ("cell respiration"[MeSH Terms] OR ("cell"[All Fields] AND "respiration"[All Fields]) OR "cell respiration"[All Fields] OR "oxygenation"[All Fields] OR "oxygen"[MeSH Terms] OR "oxygen"[All Fields] OR "oxygen s"[All Fields] OR "oxygenate"[All Fields] OR "oxygenated"[All Fields] OR "oxygenates"[All Fields] OR "oxygenating"[All Fields] OR "oxygenations"[All Fields] OR "oxygenative"[All Fields] OR "oxygenator s"[All Fields] OR "oxygenators"[MeSH Terms] OR "oxygenators"[All Fields] OR "oxygenator"[All Fields] OR "oxygene"[All Fields] OR "oxygenic"[All Fields] OR "oxygenous"[All Fields] OR "oxygens"[All Fields]))) AND ("noninvasive ventilation"[MeSH Terms] OR ("noninvasive"[All Fields] AND "ventilation"[All Fields]) OR "noninvasive ventilation"[All Fields] OR ("noninvasive ventilation"[MeSH Terms] OR ("noninvasive"[All Fields] AND "ventilation"[All Fields]) OR "noninvasive ventilation"[All Fields] OR ("noninvasive"[All Fields] AND "ventilations"[All Fields]) OR "noninvasive ventilations"[All Fields]) OR ("noninvasive ventilation"[MeSH Terms] OR ("noninvasive"[All Fields] AND "ventilation"[All Fields]) OR "noninvasive ventilation"[All Fields] OR ("ventilation"[All Fields] AND "noninvasive"[All Fields]) OR "ventilation noninvasive"[All Fields]) OR ("noninvasive ventilation"[MeSH Terms] OR ("noninvasive"[All Fields] AND "ventilation"[All Fields]) OR "noninvasive ventilation"[All Fields] OR ("ventilations"[All Fields] AND "noninvasive"[All Fields])) OR ("noninvasive ventilation"[MeSH Terms] OR ("noninvasive"[All Fields] AND "ventilation"[All Fields]) OR "noninvasive ventilation"[All Fields] OR ("non"[All Fields] AND "invasive"[All Fields] AND "ventilation"[All Fields]) OR "non invasive ventilation"[All Fields]) OR ("noninvasive ventilation"[MeSH Terms] OR ("noninvasive"[All Fields] AND "ventilation"[All Fields]) OR "noninvasive ventilation"[All Fields] OR ("non"[All Fields] AND "invasive"[All Fields] AND "ventilations"[All Fields]) OR "non invasive ventilations"[All Fields]) OR ("noninvasive ventilation"[MeSH Terms] OR ("noninvasive"[All Fields] AND "ventilation"[All Fields]) OR "noninvasive ventilation"[All Fields] OR ("ventilation"[All Fields] AND "non"[All Fields] AND "invasive"[All Fields]) OR "ventilation non invasive"[All Fields]) OR ("noninvasive ventilation"[MeSH Terms] OR ("noninvasive"[All Fields] AND "ventilation"[All Fields]) OR "noninvasive ventilation"[All Fields] OR ("ventilations"[All Fields] AND "non"[All Fields] AND "invasive"[All Fields])) OR ("noninvasive ventilation"[MeSH Terms] OR ("noninvasive"[All Fields] AND "ventilation"[All Fields]) OR "noninvasive ventilation"[All Fields] OR ("non"[All Fields] AND "invasive"[All Fields] AND "ventilation"[All Fields]) OR "non invasive ventilation"[All Fields]) OR ("noninvasive ventilation"[MeSH Terms] OR ("noninvasive"[All Fields] AND "ventilation"[All Fields]) OR "noninvasive ventilation"[All Fields] OR ("non"[All Fields] AND "invasive"[All Fields] AND "ventilations"[All Fields]) OR "non invasive ventilations"[All Fields]) OR ("noninvasive ventilation"[MeSH Terms] OR ("noninvasive"[All Fields] AND "ventilation"[All Fields]) OR "noninvasive ventilation"[All Fields] OR ("ventilation"[All Fields] AND "non"[All Fields] AND "invasive"[All Fields]) OR "ventilation non invasive"[All Fields]) OR ("noninvasive ventilation"[MeSH Terms] OR ("noninvasive"[All Fields] AND "ventilation"[All Fields]) OR "noninvasive ventilation"[All Fields] OR ("ventilations"[All Fields] AND "non"[All Fields] AND "invasive"[All Fields])))**

**Supplementary Figure S2. Risk of bias across studies**


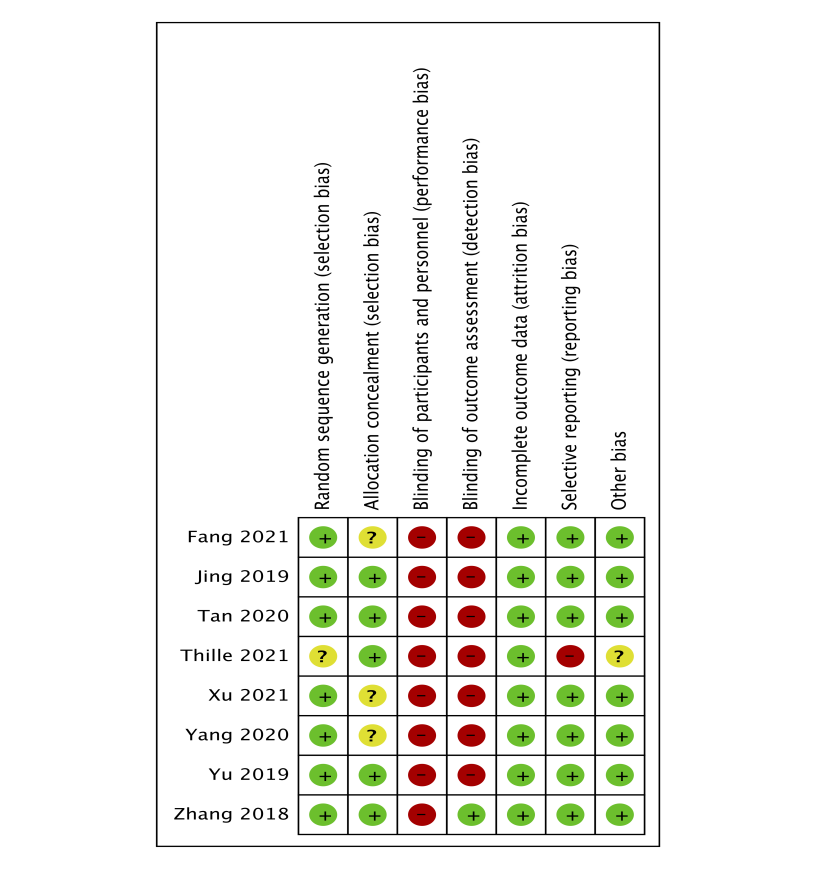

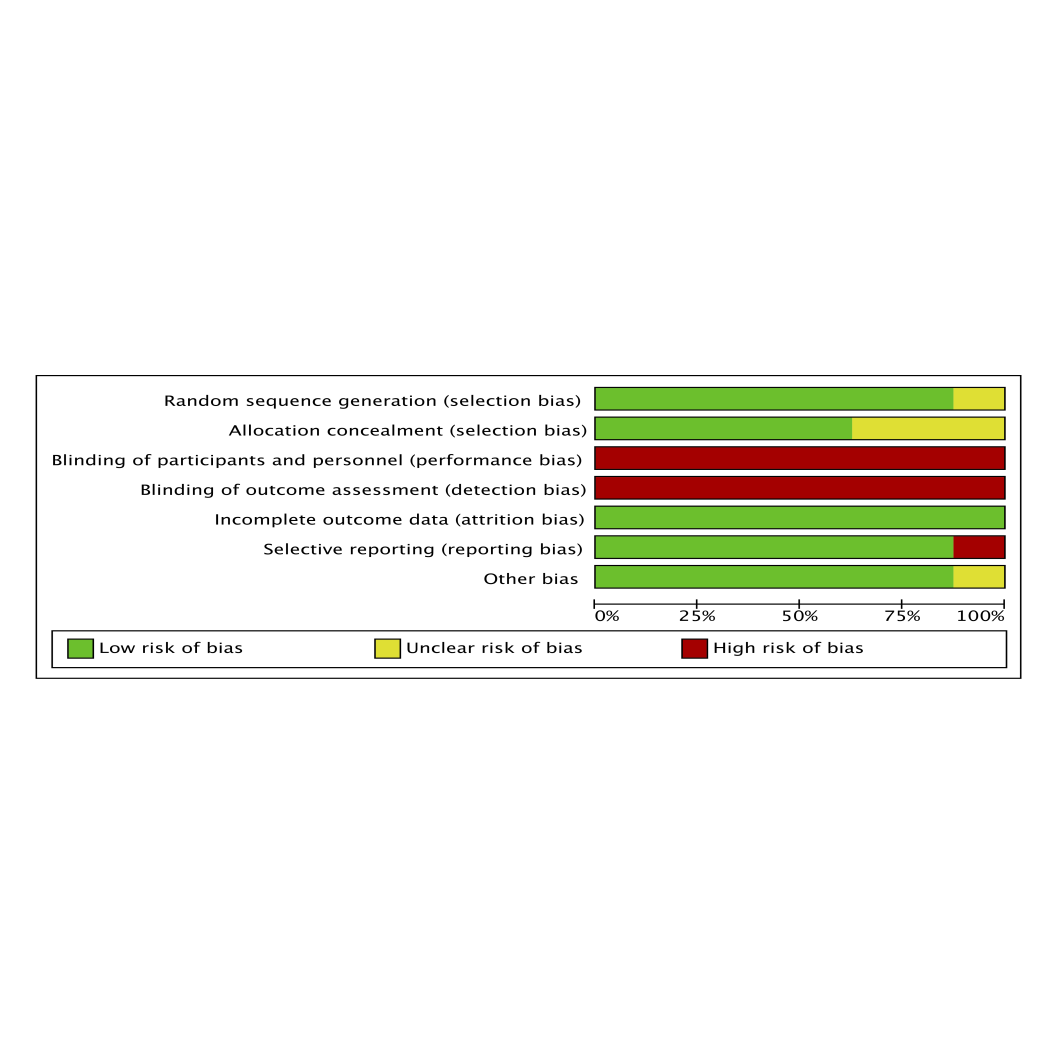


**Supplementary Figure S3. Plot of other outcomes**


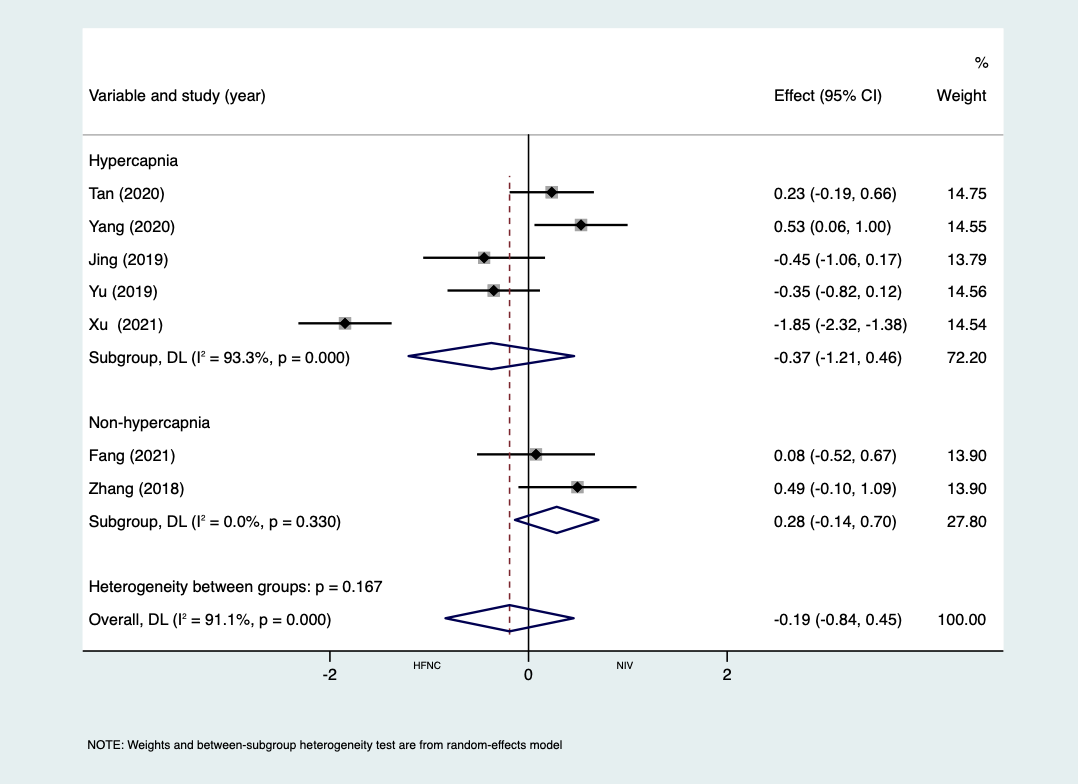


Figure S3.1:Forest plot of PaCO2,subgroup analysis was performed according to variable of hypercapnia and non-hypercapnia.


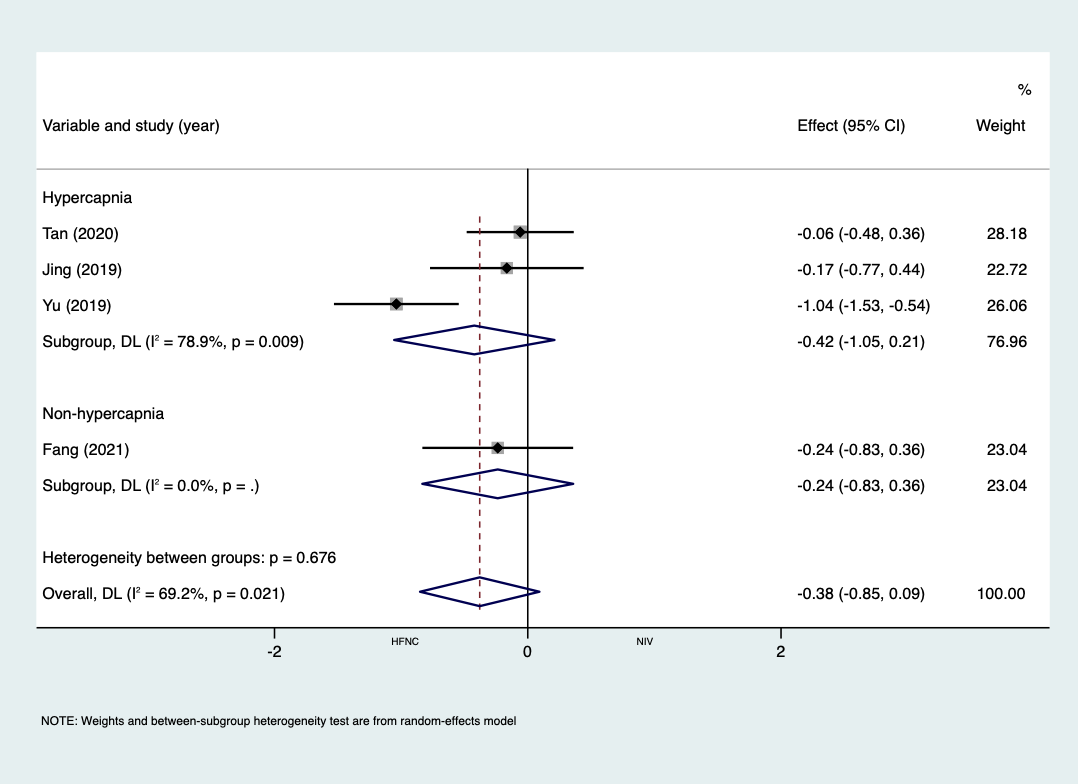


Figure S3.2:Forest plot of HR,subgroup analysis was performed according to variable of hypercapnia and non-hypercapnia.


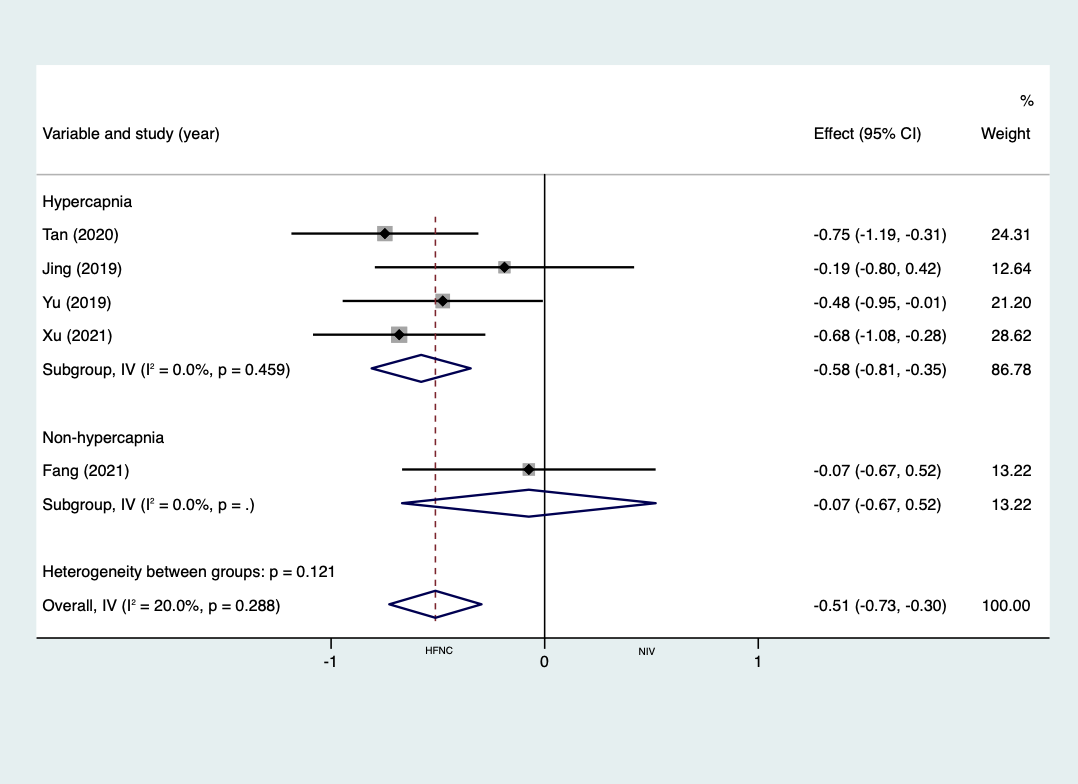


Figure S3.3:Forest plot of RR,subgroup analysis was performed according to variable of hypercapnia and non-hypercapnia.


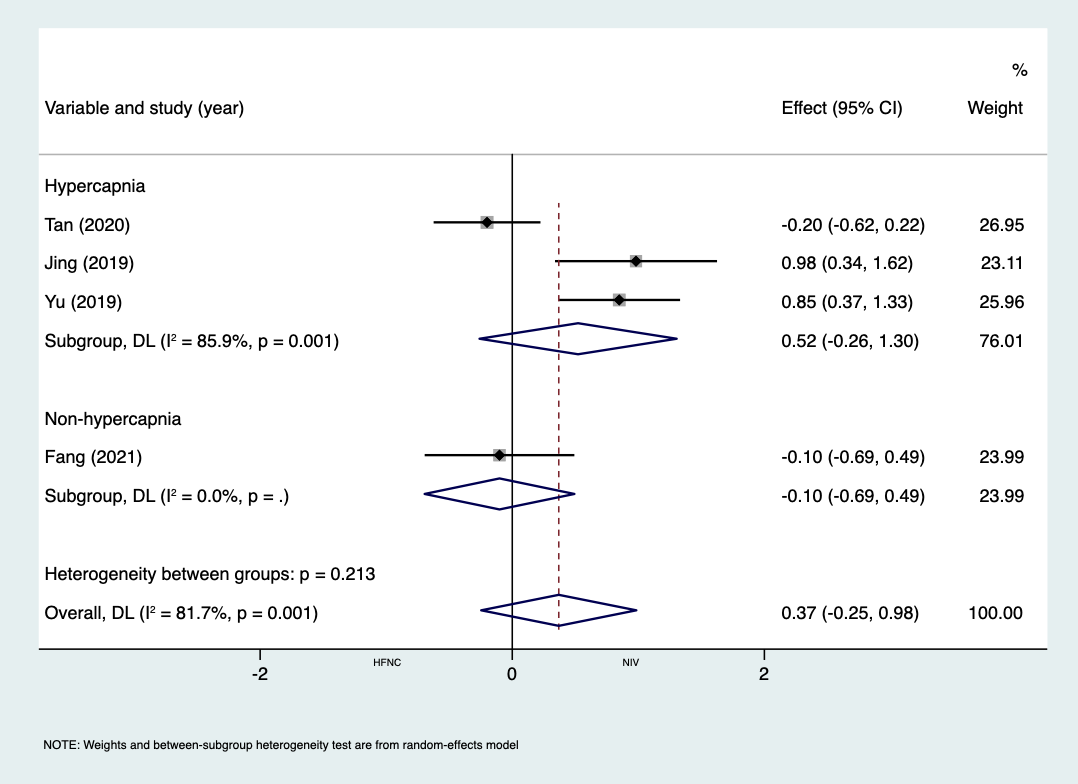


Figure S3.4:Forest plot of pH,subgroup analysis was performed according to variable of hypercapnia and non-hypercapnia.


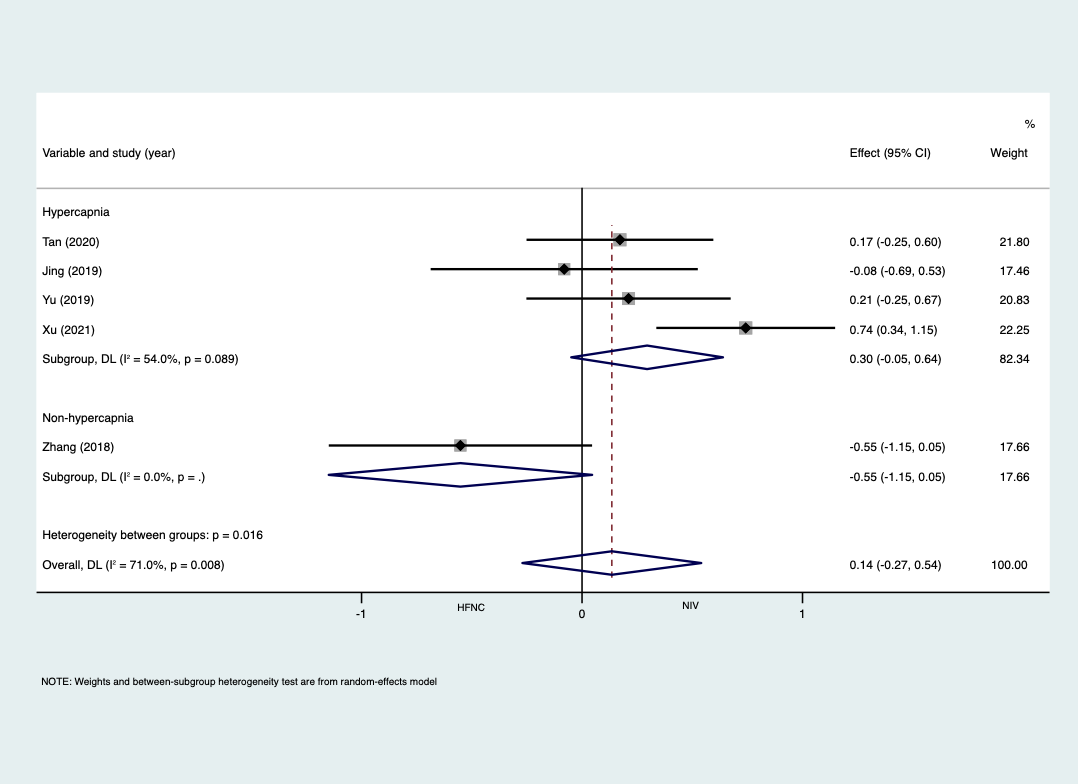


Figure S3.5:Forest plot of PaO2/FiO2,subgroup analysis was performed according to variable of hypercapnia and non-hypercapnia.

**Supplementary Figure S4. Sensitivity analysis results**

**
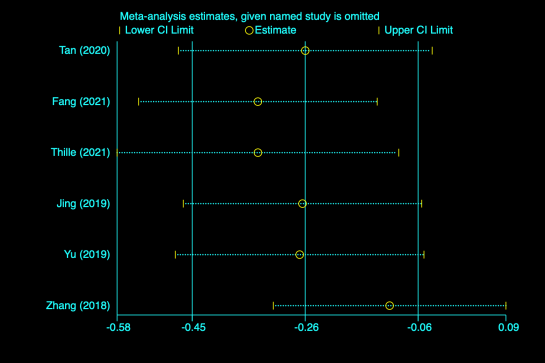

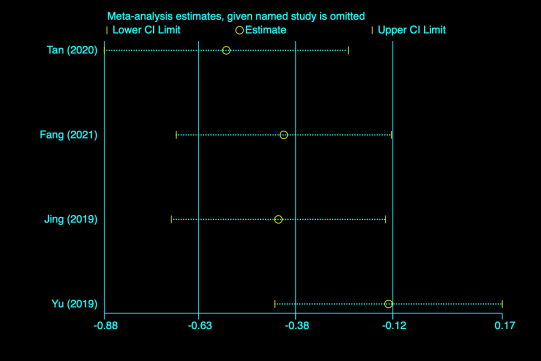
**

**Figure S4.1:Sensitivity analysis of ICU stay time****Figure S4.2:****Sensitivity analysis of HR**

**
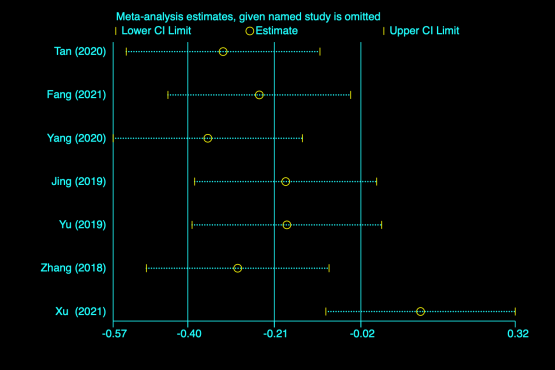

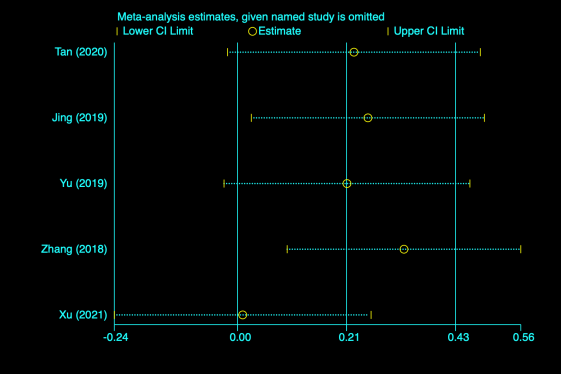
**

**Figure S4.3:Sensitivity analysis of PaCO2****Figure S4.4:****Sensitivity analysis of PaO2/FiO2**

**
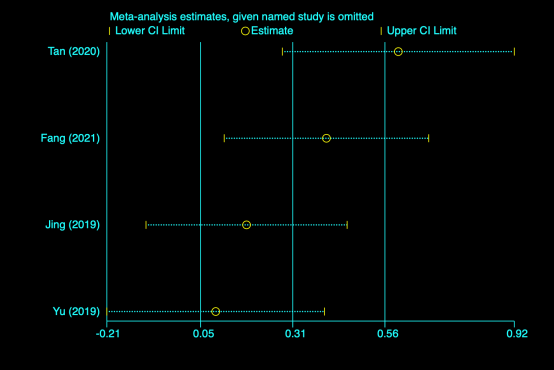
**

**Figure S4.5:Sensitivity analysis of PH**
